# Supplementary material for: Pilot-scale ozone/biological activated carbon treatment of reverse osmosis concentrate: potential for synergism between nitrate and contaminant removal and potable reuse
Source: Royal Society of Chemistry journal article supplement (doi:10.1039/d0ew00013b), 2020-01-01
Supplement: d0ew00013b1.xlsx [file d0ew00013b1.xlsx]

## Sheet: Sheet1
Design Flows	MGD	ML/D			Design parameters
Conventional Effluent	70	264.6			lifetime	40	years
	264.6				discount rate	4	percent
RO concentrate for O3 and BAC	10.5	39.69			annuity factor first term	0.208289	https://www.investopedia.com/terms/e/eac.asp
MF unit	70	264.6			annuity factor	19.7928
RO unit	70	264.6
AOP	59.5	224.91
BAC units	RO Concentrate Treatment								Conventional Effluent Treatment
10 min EBCT
Capital cost ($M/MGD)	0.963575	2011 dollars							0.701928	2011 dollars
capital cost ($M)	10.1175	2011 dollars							49.135	2011 dollars
O+M cost ($M/MGD/yr)	0.0531108	2011 dollars							0.0488575	2011 dollars
O+M cost ($M/yr)	0.557664	2011 dollars							3.42002	2011 dollars
20 min EBCT
Capital cost ($M/MGD)	1.07579	2011 dollars							0.813981	2011 dollars
capital cost ($M)	11.2958	2011 dollars							56.9787	2011 dollars
O+M cost ($M/MGD/yr)	0.06147	2011 dollars							0.057412	2011 dollars
O+M cost ($M/yr)	0.645435	2011 dollars							4.01884	2011 dollars
30 min EBCT		assume the sum for the 10 min and 20 min EBCTs in series
capital cost ($M)	21.4134	2011 dollars							106.114	2011 dollars
capital cost ($M)	25.9905	adjusted to July 2019 dollars using RSMeans							128.795	adjusted to July 2019 dollars using RSMeans
O+M cost ($M/yr)	1.2031	2011 dollars							7.43886	2011 dollars
O+M cost ($M/yr)	1.46026	adjusted to July 2019 dollars using RSMeans							9.02892	adjusted to July 2019 dollars using RSMeans
Equivalent annual cost (EAC in $M/yr)	3.67613								16.4389
Footprint (ft2)	1740	From Plumlee et al (2014) for 10 min or 20 min EBCT BAC units at ~10 MGD							12153	From Plumlee et al (2014) for 10 min or 20 min EBCT BAC units at 70 MGD
footprint (m2)	161.734	m2							1129.63	m2
Methanol needed for denitifying biofilters, which is same needed for BAC units
Nitrate conc (mg-N/L) in conventional effluent	10.4478
methanol cost paris - euro/1000 m3 for 26 mg_N/L nitrogen	15
methanol cost paris - euro/1000 m3 for 10.5 mg_N/L nitrogen	6.02755	based on proportion for levels of nitrate in conventional study vs. Parisian study (Rocher et al., 2012)
gallons per year treated	25550000000	for 70 MGD nitrified effluent into denitrified biofilter
m3/yr treated	96579000
1000 m3/yr treated	96579
euros/yr	582135
dol/yr in 2012	756776	based on $1.3/euro in 2012
dol/yr in 2017	902739	adjusted to July 2019 dollars using RSMeans
total ($M/yr)	0.902739
O3 treatment of concentrate	RO Concentrate Treatment								Conventional Effluent Treatment
Capital cost ($M/MGD)	0.634843	2011 dollars							0.227906	2011 dollars
capital cost ($M)	6.66585	2011 dollars							15.9534	2011 dollars
delta capital cost for higher O3 dose ($M)	0.9828	2011 dollars and 20 mg/L dose							0	2011 dollars and 20 mg/L dose
total cap cost ($M)	7.64865	2011 dollars							15.9534	2011 dollars
total cap cost ($M)	9.28355	adjusted to July 2019 dollars using RSMeans							19.3635	adjusted to July 2019 dollars using RSMeans
O+M cost ($M/MGD/yr)	0.00603012	2011 dollars without correction for higher O3 dose							0.00547299	2011 dollars without correction for higher O3 dose
O+M cost ($M/yr)	0.0633163	2011 dollars without correction for higher O3 dose							0.383109	2011 dollars without correction for higher O3 dose
delta O+M cost for higher O3 dose ($M/yr)	0.315	2011 dollars							0
total O+M cost ($M/yr)	0.378316	2011 dollars							0.383109	2011 dollars
total O+M cost ($M/yr)	0.459181	adjusted to July 2019 dollars using RSMeans							0.464999	adjusted to July 2019 dollars using RSMeans
Footprint for ozone
height (ft)	10	assumed							10	assumed
hydraulic residence time (min)	10	assumed							10	assumed
hydraulic residence time (d)	0.00694444	d							0.00694444	d
volume for 10.5 MGD	0.0729167	MG							0.486111	MG
volume for 10.5 MGD	72916.7	gal						volume for 70 MGD	486111	gal
volume for 10.5 MGD	9748.96	ft3						volume for 70 MGD	64993.1	ft3
footprint	974.896	ft2	O3 only					footprint	6499.31	ft2	O3 only
footprint	90.6172	m2	O3 only					footprint	604.115	m2	O3 only
O3/BAC treatment
capital cost ($M)	35.274	adjusted to July 2019 dollars using RSMeans							148.159	adjusted to July 2019 dollars using RSMeans
O+M cost ($M/yr)	1.91944	adjusted to July 2019 dollars using RSMeans							9.49392	adjusted to July 2019 dollars using RSMeans
EAC ($M/yr)	4.60435								17.8822
	0.928219								1.44331
Total footprint	252.351	m2							1733.74	m2
MF/RO/AOP treatment train
MF capital cost ($M/MGD)	1.38346	2011 dollars
MF capital cost ($M)	96.8425	2011 dollars
MF O+M cost ($M/MGD/yr)	0.1195	2011 dollars
MF O+M cost ($M/yr)	8.36497	2011 dollars
RO capital cost ($M/MGD)	2.76693	2011 dollars
RO capital cost ($M)	193.685	2011 dollars
RO O+M cost ($M/MGD/yr)	0.247224	2011 dollars
RO O+M cost ($M/yr)	17.3057	2011 dollars
AOP capital cost ($M/MGD)	0.377056	2011 dollars
AOP capital cost ($M)	22.4348	2011 dollars
AOP O+M cost ($M/MGD/yr)	0.0307262	2011 dollars
AOP O+M cost ($M/yr)	1.82821	2011 dollars
MF/RO/AOP capital cost ($M)	312.962	2011 dollars
MF/RO/AOP capital cost ($M)	379.858	adjusted to July 2019 dollars using RSMeans
MF/RO/AOP O+M cost ($M/yr)	27.4989	2011 dollars
MF/RO/AOP O+M cost ($M/yr)	33.3768	adjusted to July 2019 dollars using RSMeans
EAC ($M/yr)	52.5685
	OCWD		MGD reuse facility
Footprint	flow	ft2	ft2	m2
MF	117.647	18000	10710
RO	117.647	23500	13982.5
AOP	100	2500	1487.5
total			26180	2433.45
