# Supplementary material for: Pilot-scale ozone/biological activated carbon treatment of reverse osmosis concentrate: potential for synergism between nitrate and contaminant removal and potable reuse
Source: Royal Society of Chemistry journal article supplement (doi:10.1039/d0ew00013b), 2020-01-01
Supplement: d0ew00013b2.pdf [file d0ew00013b2.pdf]

## Supporting Information

*for*

### **Pilot-Scale Ozone/Biological Activated Carbon Treatment of Reverse Osmosis Concentrate: Potential for Synergism Between Nitrate and Contaminant Removal and Potable Reuse**

Zhong Zhang<sup>1</sup>, Jacob F. King<sup>1</sup>, Aleksandra Szczuka<sup>1</sup>, Yi-Hsueh Chuang<sup>1,2</sup>, and William A. Mitch<sup>1,\*</sup>

<sup>1</sup> Department of Civil and Environmental Engineering, Stanford University, 473 Via Ortega, Stanford, California 94305, United States

<sup>2</sup> Institute of Environmental Engineering, National Chiao Tung University, Hsinchu City, Taiwan

## Table of Contents

|                                                                                                                                                                |    |
|----------------------------------------------------------------------------------------------------------------------------------------------------------------|----|
| <b>Figure S1:</b> Schematic diagram of the pilot-scale O <sub>3</sub> /BAC system.                                                                             | S3 |
| <b>Figure S2:</b> DOC removal during the BAC acclimatization.                                                                                                  | S3 |
| <b>Text S1:</b> Analytical methods for pesticides and pharmaceuticals.                                                                                         | S4 |
| <b>Table S1:</b> Gradient method parameters.                                                                                                                   | S5 |
| <b>Table S2:</b> Optimized LC-MS/MS parameters for the analytes by MRM.                                                                                        | S6 |
| <b>Table S3:</b> Concentrations for contaminants for different O <sub>3</sub> /BAC conditions.                                                                 | S7 |
| <b>Figure S3:</b> Concentrations of fipronil sulfone, fipronil sulfide and fipronil desulfonyl                                                                 | S8 |
| <b>Figure S4.</b> Concentrations of DOC (mg-C/L), nitrite (mg-N/L) and nitrate (mg-N/L)<br>at different BAC EBCTs with 40, 60 and 70 mg-C/L methanol addition. | S9 |

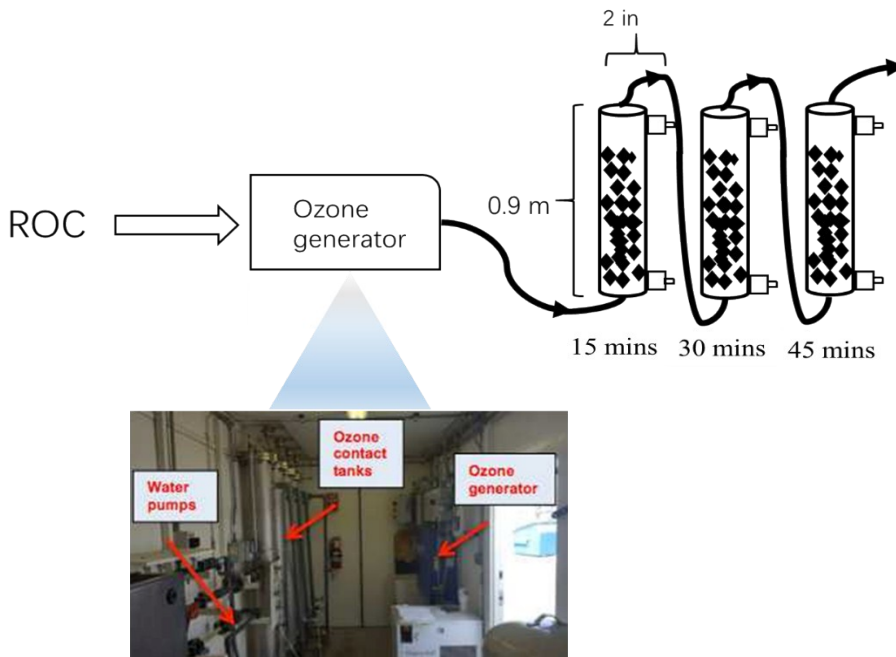

**Fig. S1.** Schematic diagram of the pilot-scale O<sub>3</sub>/BAC system.

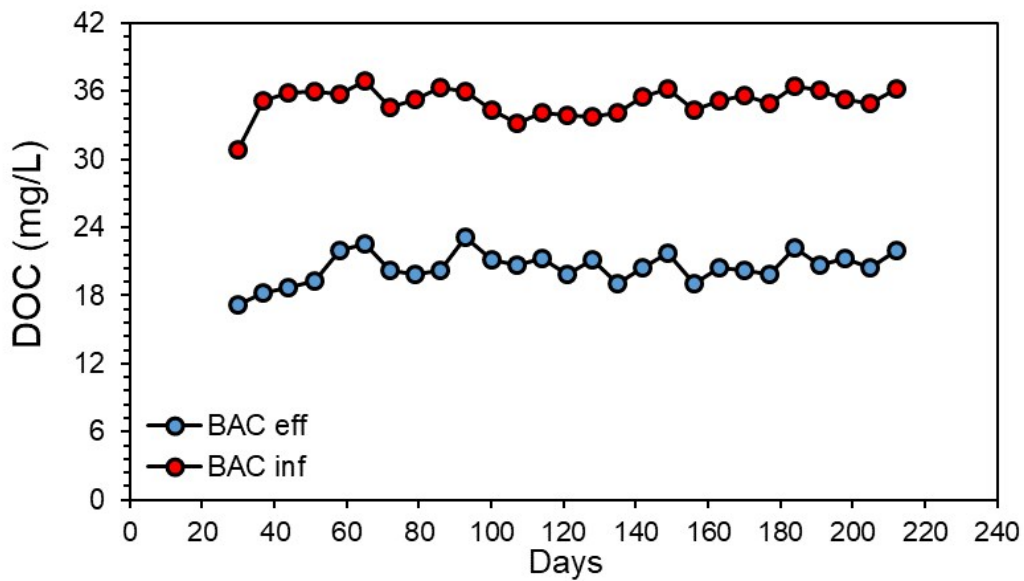

**Fig. S2.** DOC removal during BAC treatment (45 min EBCT) of O<sub>3</sub>-treated (20 mg/L (~0.5 mg O<sub>3</sub>/mg DOC)) RO concentrate during BAC column acclimatization.

## **Text S1.** Analytical methods for pesticides and pharmaceuticals

**Chemicals and reagents.** HPLC-grade organic solvents (methanol, acetonitrile) and water were purchased from Thermo Fisher Scientific. Analytical standards of imidacloprid, fipronil, fipronil desulfinyl, DEET, atenolol, sulfamethoxazole and deuterated imidacloprid-d<sub>4</sub>, atenolol-d<sub>7</sub>, DEET-d<sub>10</sub> were obtained from Sigma-Aldrich. Analytical standards of fipronil sulfide and sulfone, were obtained from Bayer and BASF. Deuterated sulfamethoxazole-d<sub>4</sub>, and mass-labeled [<sup>13</sup>C<sub>2</sub><sup>15</sup>N<sub>2</sub>] fipronil and [<sup>13</sup>C<sub>4</sub><sup>15</sup>N<sub>2</sub>] fipronil sulfone were bought from Toronto Research Chemicals and Cambridge Isotope Laboratories, respectively.

**Sample extraction.** Water samples were collected in 2 L glass bottles that had been baked at 400 °C for 3 h in a muffle oven, and were sealed with Teflon-lined caps. The samples were stored in the 4 °C cold room before extraction and sample extractions were completed within one week. Imidacloprid, fipronil, fipronil sulfone, fipronil sulfide and fipronil desulfinyl were extracted with Strata-X 33µm polymeric reversed-phased SPE cartridges (500 mg, 3 mL) obtained from Phenomenex (Torrance, CA, USA). Twenty ng of imidacloprid-d<sub>4</sub> and mass-labeled [<sup>13</sup>C<sub>2</sub><sup>15</sup>N<sub>2</sub>] fipronil and [<sup>13</sup>C<sub>4</sub><sup>15</sup>N<sub>2</sub>] fipronil sulfone were spiked into 500-mL water samples. The SPE cartridges were pre-conditioned with 6 mL acetonitrile followed by 6 mL HPLC water. Then spiked water samples were loaded on the cartridges at 2-3 mL/min. After loading, cartridges were washed with 6 mL methanol/water mixture (60:40, v/v) and then dried under a gentle nitrogen stream. The target compounds were eluted with 10 mL acetonitrile and the elution was concentrated by nitrogen blow-down to 0.5 mL for LC-MS/MS analysis.

DEET, atenolol and sulfamethoxazole (SMX) were extracted with Supel™-Select HLB SPE cartridges (200 mg, 6 mL) purchased from Supelco (Bellefonte, PA, USA). Fifty ng of DEET-d<sub>10</sub>, atenolol-d<sub>7</sub> and sulfamethoxazole-d<sub>4</sub> were spiked into 500-mL water samples. The SPE cartridges were pre-conditioned with 6 mL methanol followed by 6 mL HPLC water. The water samples were passed through the cartridges at 2-3 mL/min. Cartridges were then washed with 6 mL water and dried under a gentle nitrogen stream. The target compounds were eluted with 10 mL methanol and the elution was concentrated to 0.5 mL by nitrogen blow-down for LC-MS/MS analysis.

**LC-MS/MS analysis.** Target compounds were quantified on a LC-MS/MS triple quadrupole system (Agilent) equipped with a 150 mm × 3 mm Synergi 4 µm Hydro-RP 80 Å column (Phenomenex, Torrance, CA, USA). Compounds were separated using a 43 min gradient method at a 0.6 mL/min flowrate. The mobile phases A and B were water with 5 mM ammonium formate and methanol, respectively. The gradient is shown in the Table S2. The injection volume was 10 µL. Electrospray ionization was used to detect the compounds with the following operational parameters: capillary voltage 3500 V in both positive and negative; nebulizer pressure 45 psig; drying gas 7 L/min; gas temperature 300 °C; sheath gas flow 9 L/min; sheath gas temperature 250 °C; nozzle voltage 500 V in both positive and negative ion mode. Compound specific parameters are listed in Table S3. The method reporting limits were 10 ng/L for the pesticides and pharmaceuticals and 1 ng/L for the fipronil transformation products.

**Table S1.** Gradient method parameters. A = water with 5 mM ammonium formate, B = methanol.

| Time (min) | A (%) | B (%) |
|------------|-------|-------|
| 0          | 95    | 5     |
| 2          | 95    | 5     |
| 10         | 58    | 42    |
| 12         | 58    | 42    |
| 13         | 23    | 77    |
| 19         | 23    | 77    |
| 27         | 10    | 90    |
| 32         | 10    | 90    |
| 33         | 0     | 100   |
| 38         | 0     | 100   |
| 41         | 95    | 5     |
| 43         | 95    | 5     |

---

**Table S2.** Optimized LC-MS/MS parameters for the analytes by MRM.

| Compound                                                                       | MRM transition | Dwell (ms) | Fragmentor (V) | Collision Energy (V) | Cell Accelerator Voltage (V) | Polarity |
|--------------------------------------------------------------------------------|----------------|------------|----------------|----------------------|------------------------------|----------|
| Fipronil                                                                       | 435.0/330.0    | 50         | 112            | 8                    | 7                            | Negative |
| Fipronil sulfone                                                               | 450.9/414.9    | 25         | 140            | 5                    | 7                            | Negative |
| Fipronil sulfide                                                               | 418.9/382.9    | 25         | 110            | 5                    | 7                            | Negative |
| Fipronil desulfinyl                                                            | 387.0/351.0    | 25         | 80             | 5                    | 7                            | Negative |
| [ <sup>13</sup> C <sub>2</sub> <sup>15</sup> N <sub>2</sub> ] Fipronil         | 439.0/334.0    | 50         | 112            | 8                    | 7                            | Negative |
| [ <sup>13</sup> C <sub>4</sub> <sup>15</sup> N <sub>2</sub> ] fipronil sulfone | 456.9/420.9    | 25         | 140            | 5                    | 7                            | Negative |
| Imidacloprid                                                                   | 256.1/209.1    | 50         | 110            | 9                    | 7                            | Positive |
| Imidacloprid-d <sub>4</sub>                                                    | 260.1/213.1    | 50         | 110            | 9                    | 7                            | Positive |
| Sulfamethoxazole                                                               | 254.0/92.0     | 7          | 110            | 25                   | 7                            | Positive |
| Atenolol                                                                       | 267.0/145.0    | 7          | 130            | 24                   | 7                            | Positive |
| DEET                                                                           | 192.0/119.0    | 100        | 110            | 15                   | 7                            | Positive |
| Sulfamethoxazole-d <sub>4</sub>                                                | 258.0/96.0     | 7          | 110            | 25                   | 7                            | Positive |
| Atenolol-d <sub>7</sub>                                                        | 274.0/145.0    | 7          | 130            | 24                   | 7                            | Positive |
| DEET-d <sub>10</sub>                                                           | 202.0/119.0    | 100        | 110            | 15                   | 7                            | Positive |

**Table S3.** Concentrations (average  $\pm$  range of duplicate sample events) for emerging contaminants at different O<sub>3</sub> doses and BAC EBCTs.

| Exp. Condition                              | Conc. (ng/L) | EBCT (min)         |                |                |                |                | Removal (%)  |
|---------------------------------------------|--------------|--------------------|----------------|----------------|----------------|----------------|--------------|
|                                             |              | Pre-O <sub>3</sub> | BAC Inf.       | 15             | 30             | 45             |              |
| No ozonation                                | Imidacloprid | -                  | 427 $\pm$ 51   | 344 $\pm$ 37   | 183 $\pm$ 21   | 51 $\pm$ 3     | 88 $\pm$ 0.7 |
|                                             | Fipronil     | -                  | 179 $\pm$ 21   | 155 $\pm$ 14   | 72 $\pm$ 9     | 20 $\pm$ 5     | 89 $\pm$ 1.5 |
|                                             | Atenolol     | -                  | 2446 $\pm$ 367 | 1986 $\pm$ 417 | 1007 $\pm$ 171 | 337 $\pm$ 44   | 86 $\pm$ 0.3 |
|                                             | SMX          | -                  | 2495 $\pm$ 374 | 2454 $\pm$ 270 | 2396 $\pm$ 216 | 2316 $\pm$ 266 | 7 $\pm$ 3.3  |
|                                             | DEET         | -                  | 255 $\pm$ 54   | 237 $\pm$ 40   | 193 $\pm$ 25   | 103 $\pm$ 11   | 59 $\pm$ 4.2 |
| 0.5 mg O <sub>3</sub> /mg DOC               | Imidacloprid | 531 $\pm$ 74       | 393 $\pm$ 43   | 92 $\pm$ 7     | 11 $\pm$ 1     | ND             | 100          |
|                                             | Fipronil     | 165 $\pm$ 17       | 91 $\pm$ 6     | 21 $\pm$ 5     | 3 $\pm$ 1      | ND             | 100          |
|                                             | Atenolol     | 1324 $\pm$ 197     | 555 $\pm$ 28   | 500 $\pm$ 56   | 331 $\pm$ 110  | 63 $\pm$ 26    | 95 $\pm$ 0.2 |
|                                             | SMX          | 1417 $\pm$ 104     | 272 $\pm$ 55   | 468 $\pm$ 88   | 268 $\pm$ 47   | 256 $\pm$ 20   | 82 $\pm$ 0.1 |
|                                             | DEET         | 100 $\pm$ 36       | 78 $\pm$ 20    | 54 $\pm$ 21    | 42 $\pm$ 15    | 25 $\pm$ 6     | 74 $\pm$ 3.6 |
| 1.0 mg O <sub>3</sub> /mg DOC               | Imidacloprid | 480 $\pm$ 37       | 236 $\pm$ 41   | 65 $\pm$ 15    | ND             | ND             | 100          |
|                                             | Fipronil     | 217 $\pm$ 30       | 32 $\pm$ 5     | 4 $\pm$ 1      | ND             | ND             | 100          |
|                                             | Atenolol     | 1659 $\pm$ 365     | 179 $\pm$ 21   | 210 $\pm$ 27   | 136 $\pm$ 20   | 19 $\pm$ 1     | 99 $\pm$ 0.2 |
|                                             | SMX          | 1734 $\pm$ 75      | 122 $\pm$ 44   | 201 $\pm$ 9    | 139 $\pm$ 3    | 92 $\pm$ 21    | 95 $\pm$ 1   |
|                                             | DEET         | 661 $\pm$ 98       | 316 $\pm$ 58   | 228 $\pm$ 54   | 172 $\pm$ 43   | 103 $\pm$ 12   | 84 $\pm$ 0.5 |
| 0.5 mg O <sub>3</sub> /mg DOC with methanol | Imidacloprid | 573 $\pm$ 57       | 430 $\pm$ 65   | 75 $\pm$ 7     | 7 $\pm$ 0.4    | ND             | 100          |
|                                             | Fipronil     | 192 $\pm$ 25       | 94 $\pm$ 8     | 15 $\pm$ 2.4   | 2 $\pm$ 0.3    | ND             | 100          |
|                                             | Atenolol     | 1277 $\pm$ 268     | 834 $\pm$ 184  | 484 $\pm$ 126  | 125 $\pm$ 28   | 47 $\pm$ 13    | 96 $\pm$ 0.2 |
|                                             | SMX          | 1273 $\pm$ 230     | 234 $\pm$ 21   | 284 $\pm$ 26   | 225 $\pm$ 61   | 176 $\pm$ 14   | 86 $\pm$ 1.4 |
|                                             | DEET         | 111 $\pm$ 11       | 86 $\pm$ 14    | 41 $\pm$ 6     | 26 $\pm$ 4     | 15 $\pm$ 1     | 86 $\pm$ 0.4 |

ND = Not Detectable.

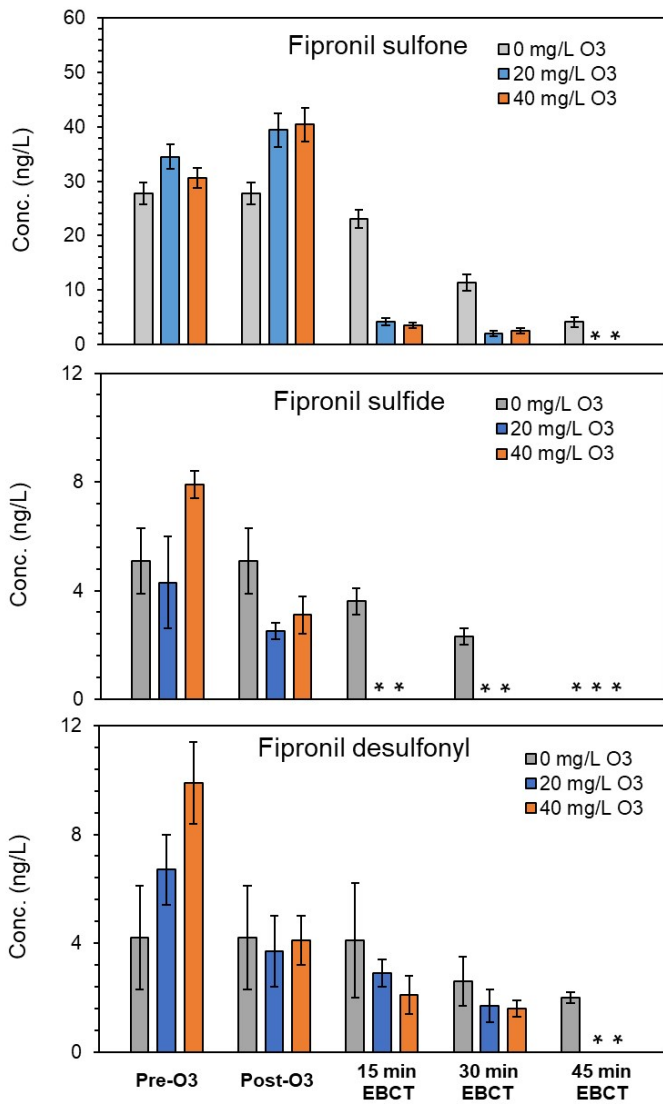

**Fig. S3.** Concentrations of fipronil sulfone, fipronil sulfide and fipronil desulfonyl at different BAC EBCTs during O<sub>3</sub>/BAC treatment with different O<sub>3</sub> doses. Error bars represent the range of duplicate samples collected on separate occasions. \* = below the reporting limits (< 1 ng/L).



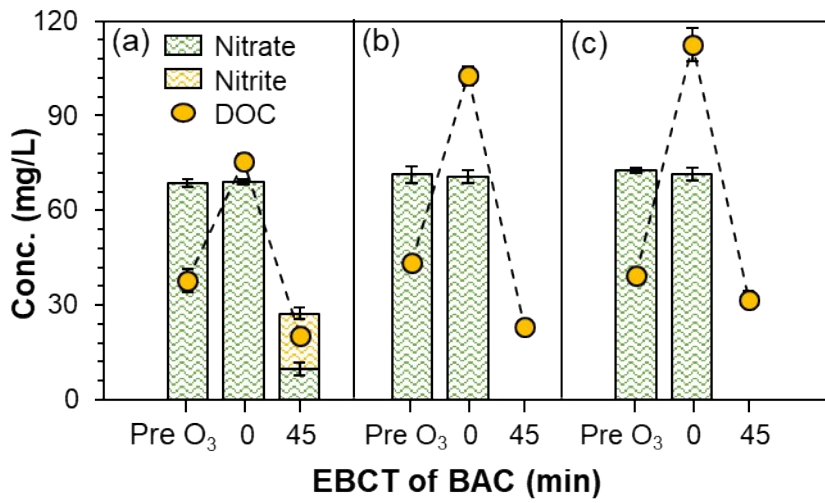

**Fig. S4.** Concentrations of DOC (mg-C/L), nitrite (mg-N/L) and nitrate (mg-N/L) at different BAC EBCTs after pre-treatment with 0.5 mg O<sub>3</sub>/mg DOC and addition of (a) 40 mg-C/L, (b) 60 mg-C/L and (c) 70 mg-C/L methanol. Error bars represent the range of duplicate samples collected on separate occasions.
